# Supplementary material for: Effect of crop plants on fitness costs associated with resistance to Bacillus thuringiensis toxins Cry1Ac and Cry2Ab in cabbage loopers
Source: PubMed Central journal article supplement (PMC4751490; doi:10.1038/srep20959), 2016-02-12
Supplement: srep20959-s1.pdf [file srep20959-s1.pdf]

## SUPPLEMENTARY FILES

### **Effect of crop plants on fitness costs associated with resistance to *Bacillus thuringiensis* toxins Cry1Ac and Cry2Ab in cabbage loopers**

**Ran Wang<sup>a,b,1,2</sup>, Guillaume Tetreau<sup>a,1,3</sup>, Ping Wang<sup>a,\*</sup>**

<sup>a</sup>Department of Entomology, Cornell University, New York State Agricultural Experiment Station, Geneva, NY 14456, USA

<sup>b</sup>Department of Entomology, Nanjing Agricultural University, Nanjing 210095, China.

<sup>1</sup>R.W. and G.T. contributed equally to this work.

<sup>2</sup>Present address: The Institute of Plant and Environment Protection, Beijing Academy of Agriculture and Forestry Sciences, Beijing 100097, China.

<sup>3</sup>Present address: Univ. Perpignan Via Domitia, IHPE UMR 5244, CNRS, IFREMER, Univ. Montpellier, F-66860 Perpignan, France.

\*To whom correspondence should be addressed. E-mail: [pingwang@cornell.edu](mailto:pingwang@cornell.edu).

**Figure S1.** Summary of analysis of deviance tables of all GLM performed on all life parameters. Factors are indicated as they were added sequentially to the model, from first to last. A binomial error family was used for traits expressed as percentages (hatching, emergence, and survival) while a Poisson error family was used for all other traits. Chi-square  $p$  values indicate the level of significance of the various factors in the model as compared to the Null model (no effect included). ‘\*’,  $p < 0.05$ ; ‘\*\*’,  $p < 0.01$ ; ‘\*\*\*’,  $p < 0.001$ .

**DEVELOPMENT (FROM EGG TO ADULT) – Poisson error**

|                          | Df | Deviance | Resid. | Df   | Resid. | Dev    | Pr(>Chi)      |
|--------------------------|----|----------|--------|------|--------|--------|---------------|
| NULL                     |    |          |        | 4189 |        | 5788.0 |               |
| Devel.Stage              | 6  | 4331.6   |        | 4183 |        | 1456.3 | < 2.2e-16 *** |
| Plant                    | 4  | 368.1    |        | 4179 |        | 1088.2 | < 2.2e-16 *** |
| Strain                   | 3  | 5.5      |        | 4176 |        | 1082.7 | 0.139825      |
| Devel.Stage:Plant        | 24 | 734.0    |        | 4152 |        | 348.7  | < 2.2e-16 *** |
| Devel.Stage:Strain       | 18 | 37.1     |        | 4134 |        | 311.6  | 0.005081 **   |
| Plant:Strain             | 12 | 4.4      |        | 4122 |        | 307.2  | 0.975177      |
| Devel.Stage:Plant:Strain | 72 | 80.8     |        | 4050 |        | 226.4  | 0.224394      |

**EGG HATCHING – Binomial error**

|              | Df | Deviance | Resid. | Df  | Resid. | Dev    | Pr(>Chi)      |
|--------------|----|----------|--------|-----|--------|--------|---------------|
| NULL         |    |          |        | 421 |        | 1.8098 |               |
| Strain       | 3  | 0.26378  |        | 418 |        | 1.5461 | < 2.2e-16 *** |
| Plant        | 4  | 0.36486  |        | 414 |        | 1.1812 | < 2.2e-16 *** |
| Strain:Plant | 12 | 0.08574  |        | 402 |        | 1.0955 | 0.001573 **   |

**EGG LAYING KINETICS – Poisson error**

|                  | Df | Deviance | Resid. | Df   | Resid. | Dev    | Pr(>Chi)      |
|------------------|----|----------|--------|------|--------|--------|---------------|
| NULL             |    |          |        | 6783 |        | 589239 |               |
| Day              | 1  | 130739   |        | 6782 |        | 458500 | < 2.2e-16 *** |
| Plant            | 4  | 13953    |        | 6778 |        | 444547 | < 2.2e-16 *** |
| Strain           | 3  | 1341     |        | 6775 |        | 443206 | < 2.2e-16 *** |
| Plant:Strain     | 11 | 1243     |        | 6764 |        | 441963 | < 2.2e-16 *** |
| Day:Plant        | 4  | 276      |        | 6760 |        | 441687 | < 2.2e-16 *** |
| Day:Strain       | 3  | 9375     |        | 6757 |        | 432312 | < 2.2e-16 *** |
| Day:Plant:Strain | 11 | 9481     |        | 6746 |        | 422831 | < 2.2e-16 *** |

**EMERGENCE OF HEALTHY ADULTS – Binomial error**

|              | Df | Deviance | Resid. | Df  | Resid. | Dev    | Pr(>Chi)    |
|--------------|----|----------|--------|-----|--------|--------|-------------|
| NULL         |    |          |        | 599 |        | 155.85 |             |
| Plant        | 4  | 16.3321  |        | 595 |        | 139.52 | 0.002604 ** |
| Strain       | 3  | 0.3170   |        | 592 |        | 139.20 | 0.956802    |
| Plant:Strain | 12 | 2.0559   |        | 580 |        | 137.14 | 0.999315    |

**FECUNDITY (TOTAL NUMBER OF EGGS PER FEMALE) - Poisson error**

|              | Df | Deviance | Resid. | Df  | Resid. | Dev   | Pr(>Chi)      |
|--------------|----|----------|--------|-----|--------|-------|---------------|
| NULL         |    |          |        | 421 |        | 29247 |               |
| Plant        | 4  | 14091.0  |        | 417 |        | 15156 | < 2.2e-16 *** |
| Strain       | 3  | 978.1    |        | 414 |        | 14178 | < 2.2e-16 *** |
| Plant:Strain | 12 | 590.4    |        | 402 |        | 13587 | < 2.2e-16 *** |

**LARVAL STAGE DURATION - Poisson error**

|              | Df | Deviance | Resid. | Df  | Resid. | Dev    | Pr(>Chi)      |
|--------------|----|----------|--------|-----|--------|--------|---------------|
| NULL         |    |          |        | 599 |        | 679.07 |               |
| Plant        | 4  | 622.12   |        | 595 |        | 56.95  | < 2.2e-16 *** |
| Strain       | 3  | 17.68    |        | 592 |        | 39.27  | 0.0005113 *** |
| Plant:Strain | 12 | 14.56    |        | 580 |        | 24.71  | 0.2661775     |

**LAYING DAYS (TOTAL NUMBER) - Poisson error**

|              | Df | Deviance | Resid. | Df  | Resid. | Dev    | Pr(>Chi)      |
|--------------|----|----------|--------|-----|--------|--------|---------------|
| NULL         |    |          |        | 421 |        | 283.80 |               |
| Plant        | 4  | 69.985   |        | 417 |        | 213.82 | 2.287e-14 *** |
| Strain       | 3  | 1.811    |        | 414 |        | 212.01 | 0.6125        |
| Plant:Strain | 12 | 6.116    |        | 402 |        | 205.89 | 0.9101        |

**MORTALITY (DEVELOPMENTAL STAGE-SPECIFIC)- Binomial error**

|                    | Df | Deviance | Resid. | Df   | Resid. | Dev    | Pr(>Chi)      |
|--------------------|----|----------|--------|------|--------|--------|---------------|
| NULL               |    |          |        | 2999 |        | 731.24 |               |
| Stage              | 4  | 28.896   |        | 2995 |        | 702.34 | 8.209e-06 *** |
| Strain             | 3  | 15.350   |        | 2992 |        | 686.99 | 0.001541 **   |
| Plant              | 4  | 107.136  |        | 2988 |        | 579.85 | < 2.2e-16 *** |
| Strain:Plant       | 12 | 5.056    |        | 2976 |        | 574.80 | 0.956087      |
| Stage:Plant        | 16 | 231.952  |        | 2960 |        | 342.85 | < 2.2e-16 *** |
| Stage:Strain       | 12 | 3.461    |        | 2948 |        | 339.39 | 0.991319      |
| Stage:Strain:Plant | 48 | 26.006   |        | 2900 |        | 313.38 | 0.996018      |

**PUPAL WEIGHT - Poisson error**

|                     | Df | Deviance | Resid. | Df   | Resid. | Dev    | Pr(>Chi) |
|---------------------|----|----------|--------|------|--------|--------|----------|
| NULL                |    |          |        | 1799 |        | 28.931 |          |
| Plant               | 4  | 9.3607   |        | 1795 |        | 19.570 | 0.05269  |
| Strain              | 3  | 0.4812   |        | 1792 |        | 19.089 | 0.92301  |
| Gender              | 1  | 0.0396   |        | 1791 |        | 19.050 | 0.84233  |
| Plant:Strain        | 12 | 0.4731   |        | 1779 |        | 18.576 | 1.00000  |
| Plant:Gender        | 4  | 0.1819   |        | 1775 |        | 18.395 | 0.99611  |
| Strain:Gender       | 3  | 0.0157   |        | 1772 |        | 18.379 | 0.99948  |
| Plant:Strain:Gender | 12 | 0.1106   |        | 1760 |        | 18.268 | 1.00000  |

**PUPAL STAGE DURATION - Poisson error**

|              | Df | Deviance | Resid. | Df  | Resid. | Dev     | Pr(>Chi)     |
|--------------|----|----------|--------|-----|--------|---------|--------------|
| NULL         |    |          |        | 594 |        | 187.377 |              |
| Plant        | 4  | 52.646   |        | 590 |        | 134.730 | 1.01e-10 *** |
| Strain       | 3  | 4.297    |        | 587 |        | 130.433 | 0.2311       |
| Plant:Strain | 12 | 39.345   |        | 575 |        | 91.088  | 9.23e-05 *** |

**SEX RATIO - Poisson error**

|              | Df | Deviance | Resid. | Df  | Resid. | Dev    | Pr(>Chi) |
|--------------|----|----------|--------|-----|--------|--------|----------|
| NULL         |    |          |        | 593 |        | 172.56 |          |
| Plant        | 3  | 5.3841   |        | 590 |        | 167.18 | 0.1457   |
| Strain       | 3  | 2.4686   |        | 587 |        | 164.71 | 0.4810   |
| Plant:Strain | 9  | 2.6523   |        | 578 |        | 162.06 | 0.9765   |

**Table S2.** Sex ratio in each strain and each plant. Values are indicated as mean  $\pm$  SD. The host plant (GLM,  $df = 3$ ,  $p = 0.15$ ), the strain (GLM,  $df = 3$ ,  $p = 0.48$ ) and their interaction (GLM,  $df = 9$ ,  $p = 0.98$ ) had no significant effect on sex ratio.

|                 | Susceptible      | Cry1Ac-R         | Cry2Ab-R          | Cry1Ac-Cry2Ab-R   | Mean             |
|-----------------|------------------|------------------|-------------------|-------------------|------------------|
| Artificial diet | 59.0 $\pm$ 17.6% | 51.1 $\pm$ 16.5% | 55.4 $\pm$ 19.9 % | 47.0 $\pm$ 16.0 % | 53.1 $\pm$ 17.5% |
| Cabbage         | 44.1 $\pm$ 15.6% | 49.4 $\pm$ 22.8% | 55.9 $\pm$ 24.7%  | 41.4 $\pm$ 24.8%  | 47.7 $\pm$ 22.0% |
| Cotton          | 46.0 $\pm$ 20.0% | 45.1 $\pm$ 18.0% | 39.2 $\pm$ 25.4%  | 36.9 $\pm$ 30.6%  | 41.8 $\pm$ 23.5% |
| Tobacco         | 40.5 $\pm$ 17.3% | 44.1 $\pm$ 24.6% | 37.1 $\pm$ 26.5%  | 37.6 $\pm$ 21.5%  | 39.8 $\pm$ 22.5% |
| Tomato          | 59.5 $\pm$ 23.8% | 53.3 $\pm$ 24.9% | 40.3 $\pm$ 32.3%  | 44.8 $\pm$ 25.6%  | 49.5 $\pm$ 26.7% |
| Mean            | 49.8 $\pm$ 18.9% | 48.6 $\pm$ 21.4% | 45.6 $\pm$ 25.8%  | 41.5 $\pm$ 23.7%  |                  |
